# Supplementary material
Source: publisher figshare collection journal article supplement (https://acs.figshare.com/ndownloader/files/33215516)
Supplement: Supplementary file 1 [file 33215516]

## **Supporting Information**

# **Cellulose Nanocrystals-Enabled Tailoring Of Interface In Carbon Nanotube- And Graphene Nanoplatelet-Carbon Fiber Polymer Composites: Implications For Structural Applications**

Ozge Kaynan<sup>1</sup>, Lisa M Pérez<sup>2</sup>, Amir Asadi<sup>1, 3, \*</sup>

<sup>1</sup> Department of Materials Science and Engineering, Texas A&M University, College Station,  
Texas 77843-3367, United States

<sup>2</sup> High Performance Research Computing, Texas A&M University, MS 3361 College Station,  
Texas 77843-3361, United States

<sup>3</sup> Department of Engineering Technology and Industrial Distribution, Texas A&M  
University, College Station, Texas 77843-3367, United States

Author for Correspondence

Prof. Amir Asadi

amir.asadi@tamu.edu

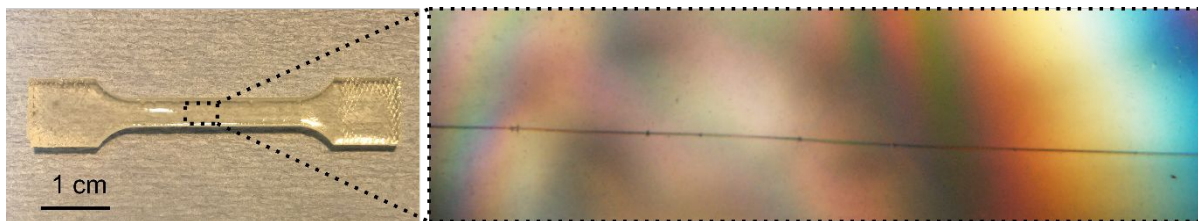

**Figure S1** The single fiber fragmentation test sample

**Table S1** The relative amount of C1s components for uncoated, CNC, CNC-CNT and CNC-GnP coated CF

|             | C-C (%) | C-O (%) | C=O (%) | $\pi$ - $\pi$ (%) |
|-------------|---------|---------|---------|-------------------|
| Uncoated CF | 71.55   | 24.80   | 2.77    | 0.87              |
| CNC         | 65.81   | 31.54   | 2.06    | 0.59              |
| CNC-CNT     | 69.13   | 25.01   | 5.03    | 0.83              |
| CNC-GnP     | 72.79   | 22.97   | 3.40    | 0.85              |

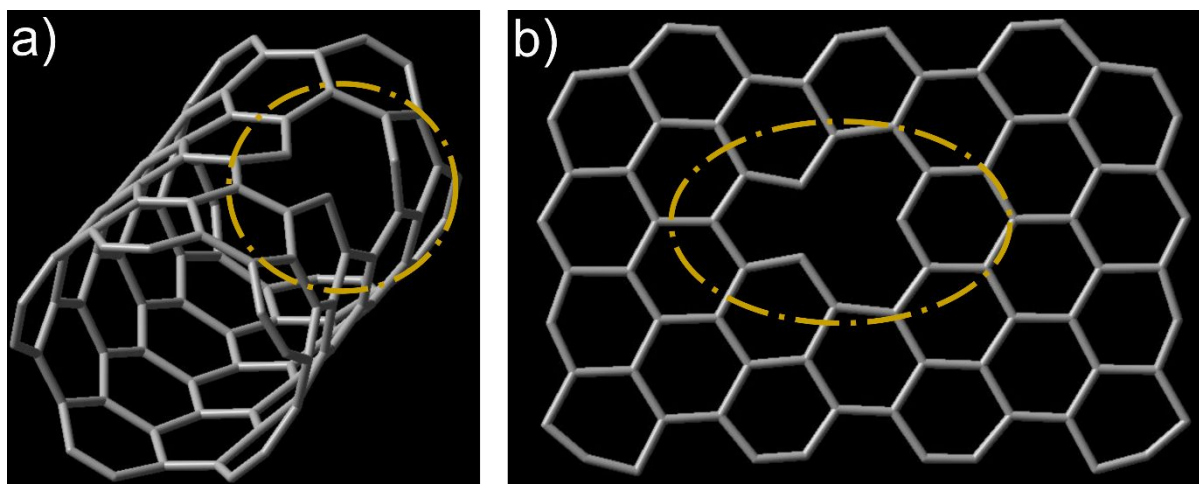

**Figure S2** The single vacancy (sv)- (a) CNT and (b) GnP

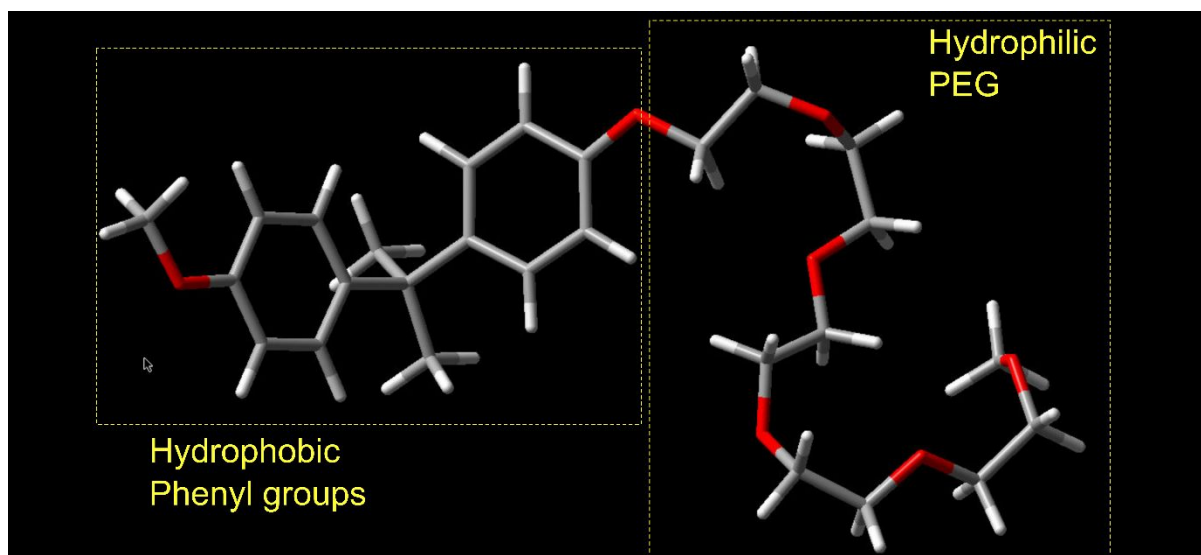

**Figure S3** The representative sizing agent adopted from Ref.<sup>1</sup> for DFT calculations. The sizing agent is composed of two regions, which are hydrophobic phenyl groups and hydrophilic Polyethylene glycol (PEG). PEG model consists of 10 repetitive units.

## References

1. Asai, H., & Anai, K. (1987). U.S. Patent No. 4,654,264. Washington, DC: U.S. Patent and Trademark Office.
